reactions during and after insertion of chlorhexidine-impregnated catheters in the operation room, the intensive care unit, and the emergency room.

**Etsuji Terazawa, M.D.**  
**Hiroyuki Shimonaka, M.D.**  
**Kiyoshi Nagase, M.D.**  
**Tatsuhiko Masue, M.D.**

Staff Anesthesiologists

**Shuji Dohi, M.D.**

Professor and Chairman

Department of Anesthesiology and Critical Care Medicine  
 Gifu University School of Medicine

Tsukasamachi, Gifu, Japan

shu\_dohi@cc.gifu-u.ac.jp

Anesthesiology

1998; 89:1298-300

© 1998 American Society of Anesthesiologists, Inc.

Lippincott Williams & Wilkins

## A Proposal for New Temperature Monitoring and Thermal Management Guidelines

*To the Editor:*—The last decade has seen publication of hundreds of articles about perioperative thermoregulation, heat balance, and consequences of thermal disturbances. We thus know far more about control of body temperature and the effects of thermal perturbations than when the original Temperature Monitoring Standards of the American Society of Anesthesiologists were introduced. More importantly, four major outcome studies were published in recent years; these studies indicate that even small reductions in intraoperative body temperature produce substantial morbidity in selected patient populations.

We must therefore consider whether revision of the current Temperature Monitoring Standards might be appropriate. To that end, I would like to summarize major recent studies relevant to patient temperature monitoring and thermal management, and their clinical implications. I will then propose a revised set of guidelines based on our current understanding of perioperative temperature control.

---

Received from the Outcomes Research<sup>™</sup> Laboratory, Department of Anesthesia, University of California, San Francisco, San Francisco, California.

Major corporate funding for the Outcomes Research<sup>™</sup> Laboratory is provided by Augustine Medical. The author does not consult for, accept honoraria from, or own stock or stock options in any anesthesia-related company.

Address reprint requests to Dr. Sessler: Department of Anesthesia, University of California, San Francisco, 374 Parnassus Avenue, 3rd Floor, San Francisco, California 94143-0068.

Key words: Anesthesia; complications; hyperthermia; thermoregulation.

## References

1. Oda T, Hamasaki J, Kanda N, Mikami K: Anaphylactic shock induced by an antiseptic-coated central venous catheter. *ANESTHESIOLOGY* 1997; 87:1242-4
2. Faber TM: Arrow gard<sup>+</sup> Blue<sup>™</sup> antiseptic surface—toxicology review. Monograph. Reading, Arrow International, 1992
3. Laxenaire MC, Moneret-Vautrin DA, Gueant JL: Drugs and other agents involved in anaphylactic shock occurring during anaesthesia. A French multicenter epidemiological inquiry. *Ann Fr Anesth Reanim* 1993; 12:91-6

(Accepted for publication July 10, 1998.)

## When Intraoperative Temperature Monitoring is Necessary

Normal core temperature varies between 36.5 and 37.5°C. Core temperature usually decreases 0.5-1.5°C in the first 30 min after induction of general anesthesia. Hypothermia results from internal redistribution of heat and various factors, the importance of which is hard to predict in individual patients.<sup>1</sup> As a result, core temperature perturbations during the first 30 min of anesthesia are difficult to interpret.

Significant subsequent decreases in core temperature are most likely in patients undergoing abdominal or thoracic surgery, but malignant hyperthermia—and hyperthermia from other causes—remains a risk in all patients. Consequently, body temperature should be monitored in most patients undergoing general anesthesia that exceeds 30 min. Body temperature ideally might be monitored continuously; however, 15-min intervals probably are sufficient in most patients.

The drugs used during intravenous sedation or regional anesthesia do not trigger malignant hyperthermia. However, core hypothermia occurs during conduction anesthesia,<sup>2</sup> especially when surgery involves major body cavities,<sup>3</sup> and often is manifested as shivering. Core temperature should therefore be measured during spinal or epidural anesthesia in patients who clinicians believe are likely to become hypothermic.

## Where to Monitor Body Temperature

The core thermal compartment is composed of highly perfused tissues, the temperature of which is uniform and high compared with the rest of the body. Temperature in this compartment can be evalu-

## CORRESPONDENCE

ated in the pulmonary artery, the distal esophagus, the tympanic membrane, or the nasopharynx. Even during rapid thermal perturbations (e.g., cardiopulmonary bypass), these temperature monitoring sites remain reliable.<sup>8</sup> Core temperature can be estimated with reasonable accuracy using oral, axillary, and bladder temperatures, except during extreme thermal perturbations.<sup>4,5</sup>

Skin surface temperatures are considerably lower than core temperature. Skin surface temperatures, when adjusted with an appropriate offset, nonetheless reflect core temperature reasonably well.<sup>6</sup> However, skin temperatures fail to reliably confirm the clinical signs of malignant hyperthermia (tachycardia and hypercarbia) in swine<sup>7</sup> and have not been evaluated for this purpose in humans. Rectal temperature also normally correlates well with core temperature<sup>4</sup> but fails to increase rapidly during malignant hyperthermia crises<sup>7</sup> and during other documented situations.<sup>8</sup> Consequently, rectal and skin surface temperatures must be used with some caution.

### Consequences of Thermal Disturbances

Thermoregulatory responses are impaired by general anesthesia.<sup>9</sup> Intraoperative core body temperature changes are thus largely determined by patient environment. Because the typical operating room is cold and because factors associated with surgery increase heat loss,<sup>10</sup> perioperative hypothermia is common. Mild hypothermia (33–35°C) provides substantial protection from tissue ischemia<sup>11,12</sup> and hypoxemia.<sup>13</sup> It also slows triggering of malignant hyperthermia, and the syndrome is less severe after being triggered in hypothermic swine.<sup>14,15</sup>

In contrast, mild hypothermia ( $\approx 2^\circ\text{C}$  below normal) prolongs drug action<sup>16,17</sup> by decreasing metabolism,<sup>18</sup> causes protein wasting,<sup>19</sup> impairs platelet<sup>20</sup> and clotting-cascade enzyme function,<sup>21,22</sup> and triggers postanesthetic shivering<sup>23,24</sup> and thermal discomfort.<sup>24,25</sup> More importantly, core temperatures that are only 1–2°C below normal are associated with adverse patient outcomes. Two groups have shown that mild hypothermia in selected patient populations prolongs postanesthetic recovery,<sup>26</sup> augments bleeding and transfusion requirements,<sup>27</sup> increases morbid myocardial outcomes,<sup>28</sup> and reduces resistance to surgical wound infections and prolonged hospital stay.<sup>29</sup>

The minor and major complications of hypothermia are thus well documented. In some patients mild hypothermia is likely to be dangerous. In others it will be an uncomfortable and slow recovery. I therefore propose that intraoperative core temperatures should usually be maintained at more than 36°C unless hypothermia is specifically indicated.

### Proposed Temperature Monitoring and Thermal Management Guidelines

#### Objective

To detect thermal disturbances and maintain appropriate body temperature during anesthesia.

\* Stone JG, Yound WL, Smith CR, Solomon RA, Ostapovich N, Reeg T, Wang A: Do temperature recorded at standard monitoring sites reflect actual brain temperature during deep hypothermia? *ANESTHESIOLOGY* 1991; 75:A483

#### Methods

1. Core body temperature should be measured or reliably estimated in most patients given general anesthesia for more than 30 min.
2. Temperature should also be measured or reliably estimated during regional anesthesia when changes in body temperature are intended, anticipated, or suspected.
3. Unless hypothermia is specifically indicated (e.g., for protection against ischemia), efforts should be made to maintain intraoperative core temperature at more than 36°C.

#### Daniel I. Sessler, M.D.

Professor

Department of Anesthesia

University of California

San Francisco, California

Professor

Ludwig Boltzmann Institute for Clinical Anesthesia and Intensive Care

Director, Outcomes Research<sup>SM</sup> and Vice Chair

Department of Anesthesia and General Intensive Care

University of Vienna

Vienna, Austria

sessler@vaxine.ucsf.edu

#### References

1. Matsukawa T, Sessler DI, Sessler AM, Schroeder M, Ozaki M, Kurz A, Cheng C: Heat flow and distribution during induction of general anesthesia. *ANESTHESIOLOGY* 1995; 82:662–73
2. Frank SM, Beattie C, Christopherson R, Norris EJ, Rock P, Parker S, Kimball AW: Epidural versus general anesthesia, ambient operating room temperature, and patient age as predictors of inadvertent hypothermia. *ANESTHESIOLOGY* 1992; 77:252–7
3. Hendolin H, Lansimies E: Skin and central temperatures during continuous epidural analgesia and general anaesthesia in patients subjected to open prostatectomy. *Ann Clin Res* 1982; 14:181–6
4. Cork RC, Vaughan RW, Humphrey LS: Precision and accuracy of intraoperative temperature monitoring. *Anesth Analg* 1983; 62:211–4
5. Glosten B, Sessler DI, Faure EAM, Stoen R, Thisted RA, Karl L: Central temperature changes are not perceived during epidural anesthesia. *ANESTHESIOLOGY* 1992; 77:10–6
6. Ikeda T, Sessler DI, Marder D, Xiong J: The influence of thermoregulatory vasomotion and ambient temperature variation on the accuracy of core-temperature estimates by cutaneous liquid-crystal thermometers. *ANESTHESIOLOGY* 1997; 86:603–12
7. Iaizzo PA, Kehler CH, Zink RS, Belani KG, Sessler DI: Thermal response in acute porcine malignant hyperthermia. *Anesth Analg* 1996; 82:803–9
8. Ash CJ, Cook JR, McMurry TA, Auner CR: The use of rectal temperature to monitor heat stroke. *Mo Med* 1992; 89:283–8
9. Sessler DI: Perioperative hypothermia. *N Engl J Med* 1997; 336:1730–7
10. Roe CF: Effect of bowel exposure on body temperature during surgical operations. *Am J Surg* 1971; 122:13–5
11. Illievich UM, Zornow MH, Choi KT, Strnat MAP, Scheeller MS: Effects of hypothermia or anesthetics on hippocampal glutamate and glycine concentrations after repeated transient global cerebral ischemia. *ANESTHESIOLOGY* 1994; 80:177–86

## CORRESPONDENCE

12. Todd MM, Warner DS: A comfortable hypothesis reevaluated: Cerebral metabolic depression and brain protection during ischemia (editorial). *ANESTHESIOLOGY* 1992; 76:161-4
13. Keykhah MM, Hägerdal M, Welsh FA, Barrer MA, Sisco F, Harp JR: Effect of high vs. low arterial blood oxygen content on cerebral energy metabolite levels during hypoxia with normothermia and hypothermia in the rat. *ANESTHESIOLOGY* 1980; 52:492-5
14. Iaizzo PA, Kehler CH, Carr RJ, Sessler DI, Belani KG: Prior hypothermia attenuates malignant hyperthermia in susceptible swine. *Anesth Analg* 1996; 82:782-9
15. Nelson TE: Porcine malignant hyperthermia: Critical temperatures for in vivo and in vitro responses. *ANESTHESIOLOGY* 1990; 73:449-54
16. Heier T, Caldwell JE, Sessler DI, Miller RD: Mild intraoperative hypothermia increases duration of action and spontaneous recovery of vecuronium blockade during nitrous oxide-isoflurane anesthesia in humans. *ANESTHESIOLOGY* 1991; 74:815-9
17. Leslie K, Sessler DI, Bjorksten AR, Moayeri A: Mild hypothermia alters propofol pharmacokinetics and increases the duration of action of atracurium. *Anesth Analg* 1995; 80:1007-14
18. Heier T, Caldwell JE, Sharma ML, Gruenke LD, Miller RD: Mild intraoperative hypothermia does not change the pharmacodynamics (concentration-effect relationship) of vecuronium in humans. *Anesth Analg* 1994; 78:973-7
19. Carli F, Emery PW, Freemantle CAJ: Effect of perioperative normothermia on postoperative protein metabolism in elderly patients undergoing hip arthroplasty. *Br J Anaesth* 1989; 63:276-82
20. Valeri CR, Khabbaz K, Khuri SF, Marquardt C, Ragno G, Feinhold H, Gray AD, Axford T: Effect of skin temperature on platelet function in patients undergoing extracorporeal bypass. *J Thorac Cardiovasc Surg* 1992; 104:108-16
21. Reed L, Johnston TD, Hudson JD, Fischer RP: The disparity between hypothermic coagulopathy and clotting studies. *J Trauma* 1992; 33:465-70
22. Staab DB, Sorensen VJ, Fath JJ, Raman SBK, Horst HM, Obeid, F N: Coagulation defects resulting from ambient temperature-induced hypothermia. *J Trauma* 1994; 36:634-8
23. Just B, Delva E, Camus Y, Lienhart A: Oxygen uptake during recovery following naloxone. *ANESTHESIOLOGY* 1992; 76:60-4
24. Kurz A, Sessler DI, Narzt E, Bekar A, Lenhardt R, Huemer G: Postoperative hemodynamic and thermoregulatory consequences of intraoperative core hypothermia. *J Clin Anesth* 1995; 7:359-66
25. Sessler DI, Rubinstein EH, Moayeri A: Physiological responses to mild perianesthetic hypothermia in humans. *ANESTHESIOLOGY* 1991; 75:594-610
26. Lenhardt R, Marker E, Goll V, Tschernich H, Kurz A, Sessler DI, Narzt E, Lackner F: Mild intraoperative hypothermia prolongs postoperative recovery. *ANESTHESIOLOGY* 1997; 87:1318-23
27. Schmied H, Kurz A, Sessler DI, Kozek S, Reiter A: Mild intraoperative hypothermia increases blood loss and allogeneic transfusion requirements during total hip arthroplasty. *Lancet* 1996; 347:289-92
28. Frank SM, Fleisher LA, Breslow MJ, Higgins MS, Olson KF, Kelly S, Beattie C: Perioperative maintenance of normothermia reduces the incidence of morbid cardiac events: A randomized clinical trial. *JAMA* 1997; 277:1127-34
29. Kurz A, Sessler DI, Lenhardt RA: Study of wound infections and temperature group: Perioperative normothermia to reduce the incidence of surgical-wound infection and shorten hospitalization. *N Engl J Med* 1996; 334:1209-15

(Accepted for publication August 6, 1998.)
